1 **TITLE: The hypoxic ventilatory response is facilitated by the activation of Lkb1-AMPK**  
2 **signalling pathways downstream of the carotid bodies**

3  
4 **RUNNING HEAD: The Lkb1-AMPK pathway and the HVR**

5  
6 Amira D. Mahmoud<sup>1</sup>, Andrew P. Holmes<sup>2</sup>, Sandy MacMillan<sup>1</sup>, Oluseye A. Ogunbayo<sup>1</sup>,  
7 Christopher N. Wyatt<sup>5</sup>, Mark L. Dallas<sup>4</sup>, Prem Kumar<sup>2</sup>, Marc Foretz<sup>3,4,5</sup>, Benoit Viollet<sup>3,4,5</sup>, A.  
8 Mark Evans<sup>1\*</sup>

9 <sup>1</sup>Centre for Discovery Brain Sciences, Hugh Robson Building, University of Edinburgh,  
10 Edinburgh, EH8 9XD, UK. <sup>2</sup>Institute of Clinical Sciences, College of Medicine and Dental  
11 Sciences, University of Birmingham, Birmingham B15 2TT, UK. <sup>3</sup>Department of Neuroscience,  
12 Cell Biology and Physiology, Wright State University, 3640 Colonel Glenn Hwy, Dayton, Ohio,  
13 USA, OH 45435. <sup>4</sup>School of Pharmacy, University of Reading, Reading RG6 6UB. <sup>5</sup>Institut  
14 Cochin, INSERM U1016, <sup>4</sup>CNRS UMR 8104 and <sup>5</sup>Université Paris Descartes, Sorbonne Paris cité,  
15 Paris, France.

16  
17 **\*CORRESPONDING AUTHOR:** A. Mark Evans, Discovery Brain Sciences, College of  
18 Medicine and Veterinary Medicine, Hugh Robson Building, University of Edinburgh, Edinburgh,  
19 EH8 9XD, UK. E-mail: [mark.evans@ed.ac.uk](mailto:mark.evans@ed.ac.uk)

20  
21 **AUTHORS' CONTRIBUTIONS**

22 A.M.E. wrote the manuscript and made Figures 3, 6 and 7. A.D.M made Figures 1, 2, 4 and 8 and  
23 supplementary Figures 1-4. S.M. made Figure 5. A.M.E. and O.A.O developed the conditional  
24 *Lkb1* knockout mice. A.M.E., A.D.M. and S.M. developed the conditional *AMPK* knockout mice,  
25 and performed genotyping. M.F. and B.V. developed the *AMPK* floxed mice. A.D.M. designed and  
26 validated primers. A.D.M. performed single cell PCR. A.M.D, S.M., and A.M.E. performed  
27 plethysmography on LKB1 and/or AMPK knockouts. A.D.M., S.M., and A.M.E. analysed  
28 respiratory data. A.P.H. and P.K. performed afferent discharge blind and under subcontract at the  
29 University of Birmingham. C.N.W. developed the murine carotid body type I cell isolation, and  
30 trained M.L.D., who carried out the type I cell isolation in support of this study.

31  
32  
33  
34 **Keywords: AMPK / apnoea / CaMKK2 / carotid body / hypoxia / LKB1 / ventilation**

35 **ABSTRACT**

36 We recently demonstrated that the role of the AMP-activated protein kinase (**AMPK**), a  
37 ubiquitously expressed enzyme that governs cell-autonomous metabolic homeostasis, has been  
38 extended to system-level control of breathing and thus oxygen and energy (ATP) supply to the  
39 body. Here we assess the contribution to the hypoxic ventilatory response (HVR) of two upstream  
40 kinases that govern the activities of AMPK. Lkb1, which activates AMPK in response to metabolic  
41 stress and CaMKK2 which mediates the alternative Ca<sup>2+</sup>-dependent mechanism of AMPK  
42 activation. HVRs remained unaffected in mice with global deletion of the CaMKK2 gene. By  
43 contrast, HVRs were markedly attenuated in mice with conditional deletion of LKB1 in  
44 catecholaminergic cells, including carotid body type I cells and brainstem respiratory networks. In  
45 these mice hypoxia evoked hypoventilation, apnoea and Cheyne-Stokes-like breathing, rather than  
46 hyperventilation. Attenuation of HVRs, albeit less severe, was also conferred in mice carrying  
47 ~90% knockdown of Lkb1 expression. Carotid body afferent input responses were retained  
48 following either ~90% knockdown of Lkb1 or AMPK deletion. In marked contrast, LKB1 deletion  
49 virtually abolished carotid body afferent discharge during normoxia, hypoxia and hypercapnia. We  
50 conclude that Lkb1 and AMPK, but not CaMKK2, facilitate HVRs at a site downstream of the  
51 carotid bodies.

52

53

## 54 1. BACKGROUND

55 The AMP-activated protein kinase (AMPK) is a cellular energy sensor that maintains cell-  
56 autonomous energy homeostasis. From its 2  $\alpha$  (catalytic), 2  $\beta$  and 3  $\gamma$  (regulatory) subunits 12  
57 AMPK heterotrimers may be formed, each harbouring different sensitivities to activation by  
58 increases in cellular AMP and ADP, and the capacity to directly phosphorylate and thus regulate  
59 different targets [1]. AMPK is coupled to mitochondrial oxidative phosphorylation by two discrete  
60 albeit cooperative pathways, involving liver kinase B1 (Lkb1) and changes in the cellular  
61 AMP:ATP and ADP:ATP ratios. Binding of AMP to the AMPK  $\gamma$  subunit increases activity 10-  
62 fold by allosteric activation alone, while AMP or ADP binding delivers increases in Lkb1-  
63 dependent phosphorylation and reductions in dephosphorylation of Thr172 on the  $\alpha$  subunit that  
64 confer 100-fold further activation. All of these effects are inhibited by ATP [2]. Lkb1 is, therefore,  
65 the principal pathway for AMPK activation during metabolic stresses such as hypoxia. However,  
66 there are alternative  $\text{Ca}^{2+}$ -dependent pathways to AMPK activation that are governed by the  
67 calmodulin-dependent protein kinase CaMKK2, which delivers increases in Thr172  
68 phosphorylation and thus AMPK activation independent of changes in cellular AM(D)P:ATP  
69 ratios.

70 Classically AMPK regulates cell-autonomous pathways of energy supply by phosphorylating  
71 targets that switch off non-essential anabolic processes that consume ATP and switch on catabolic  
72 pathways that generate ATP, thereby compensating for deficits in ATP supply or availability[1].  
73 Recently, however, we demonstrated [3] that the role of AMPK in metabolic homeostasis is not  
74 limited to such cell autonomous pathways, but extends to the hypoxic ventilatory response  
75 (HVR)[4, 5] and thus  $\text{O}_2$  and energy (ATP) supply to the body as a whole. In doing so AMPK acts  
76 to oppose central respiratory depression during hypoxia and thus resists hypoventilation and

77 apnoea. Surprisingly, however, AMPK deficiency did not precipitate ventilatory dysfunction at the  
78 level of the carotid bodies as one would predict given their role as the primary arterial  
79 chemoreceptors [5-8], but attenuated activation during hypoxia of the caudal brainstem while  
80 afferent input responses from the carotid bodies were normal [3]. We therefore hypothesised that  
81 AMPK may aid delivery of HVRs by integrating “local hypoxic stress” within brainstem  
82 respiratory networks with an index of “peripheral hypoxic status” provided via afferent  
83 chemosensory inputs. In this respect it is clear that the capacity for signal integration could be  
84 determined centrally either through AMPK activation consequent to brainstem hypoxia, increases  
85 in the AM(D)P:ATP ratio and thus Lkb1-dependent phosphorylation, or CaMKK2-dependent  
86 phosphorylation in response to increases in cytoplasmic Ca<sup>2+</sup>.  
87 Using a variety of genetic mouse models, along with both *in vitro* and *in vivo* approaches, the  
88 present study examines whether Lkb1 and/or CaMKK2 are important drivers of HVRs. We reveal  
89 that Lkb1-AMPK signalling pathways facilitate HVRs independent of CaMKK2.

90

## 91 **2. RESULTS**

92 Because global gene deletion of *Lkb1* or *AMPK $\alpha$ 1+ $\alpha$ 2* is embryonic lethal we employed  
93 conditional deletion of these genes. For *Lkb1* deletion we used floxed mice in which the gene  
94 encoding Lkb1 (*Stk11*) had been replaced by a cDNA cassette encoding equivalent exon sequences,  
95 and exon 4 and the cDNA cassette flanked by loxP sequences, which in their own right deliver  
96 ~90% global knockdown of Lkb1 expression [9]. For *AMPK $\alpha$ 1+ $\alpha$ 2* deletion critical exons of the  
97 genes encoding AMPK $\alpha$ 1 (*Prkaa1*) and AMPK $\alpha$ 2 subunits (*Prkaa2*) were flanked by loxP  
98 sequences [10]. Each floxed mouse line was crossed, as previously described [3], with mice  
99 expressing Cre recombinase under the control of the tyrosine hydroxylase (TH) promoter,  
100 providing for gene deletion in all catecholaminergic cells inclusive of those cells that constitute the

101 hypoxia-responsive respiratory network from carotid body [8] to brainstem [11]. Transient  
102 developmental expression of TH does occur in disparate cell types that do not express TH in the  
103 adult [12], such as dorsal root ganglion cells and pancreatic islets, but these do not contribute to  
104 the acute HVR. We previously confirmed restriction of Cre to TH-positive cells in the adult mouse  
105 by viral transfection of a Cre-inducible vector carrying a reporter gene[3]. Therefore, our approach  
106 overcomes embryonic lethality and allows, unforeseen ectopic Cre expression aside, for greater  
107 discrimination of circuit mechanisms than would be provided for by global knockouts. The role of  
108 CaMKK2 in the hypoxic ventilatory response (HVR) was determined by assessing mice with  
109 global deletion of the corresponding gene (*CaMKK2*) [13].  
110 Under normoxia there was no difference between controls and either *Lkb1*, *CaMKK2* or, as  
111 previously shown, *AMPK $\alpha$ 1+ $\alpha$ 2* knockouts[14] with respect to weight versus age, breathing  
112 frequency, tidal volume or minute ventilation (**Supplementary Fig 1 and 2**). Nevertheless,  
113 profound and genotype-specific differences were observed with respect to the ventilatory responses  
114 during hypoxia and hypercapnia.

115  
116 **2.1 HVRs are attenuated in mice with *Lkb1* deficiency but remain unaffected by global**  
117 ***CaMKK2* deletion**

118 Attenuation of HVRs was observed in *Lkb1* floxed mice used here, which harbour ~90% global  
119 *Lkb1* deficiency [9]. In this respect it is notable (see below) that this effect only reached  
120 significance, compared to controls (C57/Bl6 and TH-Cre), during the sustained phase of the  
121 response to severe but not moderate hypoxia (**Fig 1A-B**), i.e. these mice exhibited delayed  
122 hypoventilation during hypoxia. This provides indirect support of our proposal that AMPK  
123 facilitates HVRs downstream of the carotid bodies, because this observation is accordance with the  
124 view that carotid body chemoafferent input responses drive the augmenting phase of HVRs [15,

125 16] while activation by hypoxia of brainstem respiratory networks may provide for maintenance  
126 of HVRs in the longer term [3, 5, 16-19].

127 The effect of conditional *Lkb1* deletion (**Fig 2, and Supplementary Fig 3**) was more severe, with  
128 HVRs suppressed, relative to controls (TH-Cre), during 5 min exposures to either mild (12% O<sub>2</sub>;  
129 **Fig 2AI and BI upper panels**) or severe hypoxia (8% O<sub>2</sub>; **Fig 2AII and BII upper panels**) and in  
130 a manner proportional to the severity of hypoxia. Relative to control mice (TH-Cre), the peak  
131 change in minute ventilation (~30s) achieved by *Lkb1* knockouts during the initial “Augmenting  
132 Phase” was lower (P<0.0001, compared to TH-Cre). This is important because there is general  
133 agreement that this phase of the HVR primarily results from carotid body afferent input responses  
134 [4, 5, 15]. Minute ventilation was similarly depressed relative to controls following subsequent  
135 ventilatory depression (Roll Off, ~100s, NS) and during the latter sustained phase of the response  
136 to hypoxia (2-5min; P<0.0001). Note: 0.05% CO<sub>2</sub> used here is probably insufficient to prevent  
137 significant respiratory alkalosis which may have impacted ventilatory reflexes during the latter  
138 phases of the sustained hypoxic stimulus [20] of wild type mice in particular. Therefore, we may  
139 have underestimated the degree to which *Lkb1* deletion inhibits HVRs.

140 By contrast, global deletion of CaMKK2 did not affect HVRs in any discernable way (**Fig 2BI-II**  
141 **lower panels**), ruling out a prominent role for AMPK activation through this alternative Ca<sup>2+</sup>-  
142 dependent pathway.

## 143 **2.2 Attenuation of HVRs by *Lkb1* deletion results from deficits in breathing frequency**

144 Intriguingly, deficits in minute ventilation in *Lkb1* floxed mice resulted from attenuation of  
145 increases in breathing frequency at all time points during exposure to severe (8% O<sub>2</sub>; n=22;  
146 P≤0.0001) but not mild (12%; n=15; NS) hypoxia. Increases in breathing frequency were even  
147 more markedly attenuated by homozygous *Lkb1* deletion and at all time points during exposure to  
148 both mild and severe hypoxia when compared to controls (TH-Cre; P<0.0001; **Fig 3A**), albeit in a

149 manner proportional to the severity of hypoxia. By contrast no attenuation of increases in tidal  
150 volume were observed for either *Lkb1* floxed mice or *Lkb1* knockouts during mild or severe  
151 hypoxia.

152 The aforementioned findings are intriguing because it has been proposed that peripheral  
153 chemoreceptors primarily drive increases in breathing frequency during moderate to severe  
154 hypoxia (see for example [21]). It is therefore all the more important to note that mice with  
155 conditional deletion of *AMPK $\alpha$ 1+ $\alpha$ 2* in catecholaminergic cells, which retain carotid body afferent  
156 input responses, exhibit markedly attenuated increases in breathing frequency but not tidal volume  
157 at all time points when exposed to mild hypoxia (12% O<sub>2</sub>; **Fig 3A-B**). By contrast, however,  
158 *AMPK $\alpha$ 1+ $\alpha$ 2* deletion attenuated increases in both breathing frequency and tidal volume during  
159 severe (8% O<sub>2</sub>) hypoxia [14]. When taken together these findings strongly suggest that  
160 *Lkb1*-AMPK signalling pathways facilitate HVRs and oppose respiratory depression during  
161 hypoxia. Moreover, outcomes suggest that those circuit mechanisms that mediate hypoxia-evoked  
162 increases in tidal volume are afforded greater protection from the impact of *Lkb1* and AMPK  
163 deficiency than those delivering increases in breathing frequency.

### 164 **2.3 *Lkb1* deficiency causes ventilatory instability and Cheyne-Stokes-like breathing during** 165 **hypoxia.**

166 Quite unlike our previously reported findings in mice with *AMPK $\alpha$ 1+ $\alpha$ 2* deletion[14], average  
167 measures (excluding apnoeas) for *Lkb1* knockouts indicated significant augmentation rather than  
168 attenuation of increases in tidal volume during severe hypoxia, relative to controls (P<0.01 at 100s  
169 and 300s compared to TH-Cre). Closer inspection revealed that attenuation of HVRs in *Lkb1*  
170 knockouts during exposure to 8% O<sub>2</sub> only, was associated with periods of Cheyne-Stokes-like  
171 breathing (CSB), i.e., tidal volume exhibited marked, sinusoidal variations with time (**Fig 4A and**  
172 **B**). Periods of CSB in *Lkb1* knockout mice were generally separated by frequent, prolonged

173 apnoeas ( $\leq 4$ s), with apnoea frequency, apnoea duration and apnoea duration index (frequency x  
174 duration) all significantly larger ( $P < 0.0001$ ) than for controls (**Fig 4C**). Nevertheless, as might be  
175 expected given outcomes for minute ventilation, apnoea frequency and duration also increased in  
176 a manner directly related to the severity of hypoxia. Moreover, CSB and increases in apnoea  
177 frequency and duration observed during severe hypoxia were completely reversed by hypercapnic  
178 hypoxia (**Fig 4AIII and C**), likely due to improved  $O_2$  supply consequent to increases in ventilation  
179 (see below). The appearance of CSB likely accounts for measured increases in tidal volume for  
180 these mice relative to controls. That aside it is important to note that periods of hypoxia-evoked  
181 CSB in *Lkb1* knockouts occurred irrespective of whether they were preceded by spontaneous or  
182 post-sigh apnoeas (**Fig 4B**). Moreover both spontaneous and post-sigh apnoeas were equally  
183 frequent during exposure of *AMPK $\alpha 1 + \alpha 2$*  knockouts to severe hypoxia, where CSB is absent  
184 during 5 min [3] or even 10 min (**Fig 5**) exposures to severe hypoxia. In short, if sighs are triggered  
185 by hypoxia at a given threshold [3, 22], central hypoxia is likely no more severe for *Lkb1* when  
186 compared to *AMPK $\alpha 1 + \alpha 2$*  knockouts and CSB consequent to *Lkb1* deficiency is thus most likely  
187 triggered by other means.

188

## 189 **2.2 Conditional *Lkb1* deletion slows the ventilatory response to hypercapnic hypoxia and** 190 **hypercapnia**

191 The ventilatory response to hypercapnic hypoxia (8%  $O_2$  + 5%  $CO_2$ ) remained entirely unaffected  
192 following *AMPK $\alpha 1 + \alpha 2$*  deletion [3]. By contrast, in *Lkb1* knockouts increases in minute  
193 ventilation were attenuated, but only during the rising phase of the ventilatory response to  
194 hypercapnic hypoxia ( $P < 0.01$ ; **Fig 6A**), indicating that *Lkb1* deletion slowed the rising phase of the  
195 response to this stimulus but did not affect the peak achieved. It is possible that this may reflect the  
196 partial restoration of the initial rise in respiratory frequency during hypercapnic hypoxia, that is



197 attenuated during hypoxia alone (**Supplementary Fig 4**). However, the rise in minute ventilation  
198 during exposure to hypercapnia alone (5% CO<sub>2</sub>) was also markedly slower for *Lkb1* knockouts  
199 (P<0.05), but thereafter achieved an equivalent magnitude (**Fig 6B**), as a consequence of equivalent  
200 peak increases in both respiratory frequency and tidal volume (**Supplementary Fig 4**). By contrast,  
201 mice with *AMPK $\alpha$ 1+ $\alpha$ 2* deletion had preserved peak hypercapnic ventilatory responses without  
202 any initial delay in onset (**Fig 6A-B**).

### 203

### 204 **2.3 *Lkb1* but not *AMPK $\alpha$ 1+ $\alpha$ 2* deletion attenuates carotid body chemoafferent discharge**

### 205 **during normoxia, hypoxia and hypercapnia**

206 During normoxia mean $\pm$ SEM basal afferent fibre discharge frequency from *in-vitro* carotid bodies  
207 of TH-Cre mice was similar to that for carotid bodies of homozygous *Lkb1* floxed mice that harbour  
208 ~90% global *Lkb1* deficiency [9]. In marked contrast, however, basal afferent discharge measured  
209 from carotid bodies of *Lkb1* knockouts was markedly attenuated (**Fig 7C**; n=7; P $\leq$ 0.001 versus  
210 TH-Cre and *Lkb1* floxed).

211 In line with the above, reductions in superfusate PO<sub>2</sub> increased chemoafferent discharge from  
212 carotid bodies of TH-Cre mice exponentially, but evoked only marginal increases in afferent  
213 discharge from carotid bodies of *Lkb1* knockouts (P<0.0001; **Fig 7C**). By contrast, peak discharge  
214 frequencies (PO<sub>2</sub>  $\leq$ 75 mmHg) of carotid bodies from hypomorphic *Lkb1* floxed mice were  
215 attenuated by less than 50% relative to controls, despite the fact that these mice exhibit global  
216 deficits in *Lkb1* expression of ~90% [9]

217 For *AMPK $\alpha$ 1+ $\alpha$ 2* deletion basal afferent discharge frequency was higher than recorded for  
218 *AMPK $\alpha$ 1+ $\alpha$ 2* floxed mice (n=5; P<0.001) [3], but not significantly different from measures for  
219 either TH-Cre (n = 8) or the hypomorphic *Lkb1* floxed (n =7) mice. *AMPK $\alpha$ 1+ $\alpha$ 2* floxed mice may  
220 represent the better comparison, raising the possibility that AMPK may ordinarily act to reduce

221 basal afferent discharge frequency through, for example, inhibition of the large conductance  
222 voltage- and calcium-activated potassium current (BK<sub>Ca</sub>)[23]. However, it is clear that this does  
223 not hold when basal discharge of *AMPK $\alpha$ 1+ $\alpha$ 2* knockouts is compared against our full range of  
224 control mice. Moreover, peak discharge frequency during hypoxia (**Fig 7C**) was similar for  
225 *AMPK $\alpha$ 1+ $\alpha$ 2* knockouts when compared to *AMPK $\alpha$ 1+ $\alpha$ 2* floxed (n=5; NS) and TH-Cre mice (n=8;  
226 NS).

227 Carotid bodies isolated from *AMPK $\alpha$ 1+ $\alpha$ 2* knockouts also had a preserved chemoafferent response  
228 to hypercapnia. By contrast, *Lkb1* deletion (n=4) inhibited carotid body responses to hypercapnia  
229 and reduced carotid body CO<sub>2</sub>-sensitivity (which is linear between 40 and 80 mmHg) when  
230 compared to TH-Cre (n=7; **Fig 7D**). This may explain, in part, the slower rising phase of the  
231 ventilatory response of *Lkb1* knockouts during hypercapnic hypoxia and hypercapnia, as carotid  
232 body afferent inputs to the brainstem determine this [15, 24].

#### 233 **2.4 The rank order of severity for HVR versus carotid body dysfunction is different**

234 As demonstrated above, while *Lkb1* deletion virtually abolished, hypomorphic *Lkb1* expression  
235 modestly attenuated and *AMPK $\alpha$ 1+ $\alpha$ 2* deletion was without effect on afferent output from the  
236 carotid body during hypoxia, all three interventions markedly attenuated the HVR during severe  
237 hypoxia. Moreover, the order of severity for hypoxic ventilatory dysfunction was different when  
238 compared to that for inhibition of carotid body chemoafferent discharge during hypoxia. This is  
239 evident from **Fig 8**, which compares Poincaré plots of inter-breath interval (BB<sub>n</sub>) versus  
240 subsequent inter-breath interval (BB<sub>n+1</sub>) during normoxia (**AI**), 12% O<sub>2</sub> (**BI**), 8% O<sub>2</sub> (**CI**), 8% O<sub>2</sub>  
241 + 5% CO<sub>2</sub> (**DI**) for controls (TH-Cre), hypomorphic *Lkb1* floxed mice and *Lkb1* knockouts (**Fig**  
242 **8AI-DI**, *left hand panels*) with previously published [3] examples for *AMPK $\alpha$ 1+ $\alpha$ 2* knockouts (**Fig**  
243 **8AI-DI**, *right hand panels*), the SD of inter-breath intervals (**Fig 8AII-DII**), minute ventilation  
244 (**Fig 8E**), and apnoea frequency, duration and duration index (**Fig 8F I-III**). Clearly, ventilatory

245 dysfunction worsened with progressive loss of *Lkb1*, but was most severe following *AMPK $\alpha$ 1+ $\alpha$ 2*  
246 deletion.

### 247 **3. DISCUSSION**

248 The present study demonstrates that deletion of *Lkb1* or *AMPK $\alpha$ 1+ $\alpha$ 2*, but not *CaMKK2*, attenuates  
249 HVRs, precipitating hypoventilation and apnoea during hypoxia. The LKB1-AMPK signalling  
250 pathway is therefore critical to the delivery of ventilatory drive during hypoxia, and acts to oppose  
251 ventilatory depression, hypoventilation and apnoea. However, surprising differences between *Lkb1*  
252 and *AMPK $\alpha$ 1+ $\alpha$ 2* knockouts were identified with respect to both HVRs and carotid body afferent  
253 fibre discharge, which provides further substantiation of our proposal [3] that AMPK facilitates  
254 HVRs downstream of peripheral chemoafferent input responses, most likely at the brainstem.

255 Of particular note in this respect was the fact that LKB1 deletion attenuated HVRs and hypoxia-  
256 evoked increases in carotid body afferent discharge, while by contrast *AMPK $\alpha$ 1+ $\alpha$ 2* deletion  
257 abolished HVRs but had little if any effect on carotid body afferent discharge during hypoxia [3].  
258 Irrespective of the precise cellular mechanism, it is therefore clear that we have uncovered a split  
259 in the dependency on *Lkb1* and AMPK of carotid body chemoafferent discharge during hypoxia  
260 on the one hand and HVRs on the other.

261 This view gained support from our studies on *Lkb1* floxed mice, which exhibit ~90% global *Lkb1*  
262 deficiency [9], but retain significantly greater capacity for basal and hypoxia-evoked carotid body  
263 afferent discharge than do *Lkb1* knockouts and yet still exhibit delayed hypoventilation and apnoea  
264 during severe hypoxia (8% O<sub>2</sub>). Intriguingly in this respect, deficits in minute ventilation were  
265 evident for *Lkb1* floxed mice during the sustained but not the augmenting phase. This is entirely  
266 consistent with an inhibitory effect downstream of chemoafferent input responses, if one accepts  
267 evidence supporting the view that increases in carotid body afferent discharge drive the augmenting  
268 phase of HVRs [15, 16] while direct modulation by hypoxia of brainstem respiratory networks

269 maintains HVRs in the longer term [3-5, 16, 17]. Further support for this proposal may be derived  
270 from the fact that the order of severity for hypoxic ventilatory dysfunction increases progressively  
271 with the degree of *Lkb1* deficiency (Fig. 5), but is most severe following *AMPK- $\alpha1+\alpha2$*  deletion  
272 [3]. This is in spite of our finding that only *Lkb1* deletion attenuates carotid body afferent discharge,  
273 and suggests that the increased severity of ventilatory instability during sustained hypoxia is  
274 governed centrally by AMPK activity in catecholaminergic neurons.

275 Differences in outcome between genotypes provide yet further insights into the underlying circuit  
276 mechanisms governing HVRs. Hypomorphic *Lkb1* floxed mice exhibit marked attenuation of  
277 breathing frequency responses during severe hypoxia while tidal volume responses remained  
278 largely unaltered. *AMPK $\alpha1/\alpha2$*  deletion similarly attenuated only breathing frequency during mild  
279 hypoxia (12% O<sub>2</sub>), but blocked increases in both breathing frequency and tidal volume during  
280 severe hypoxia. Given that HVRs of mice hypomorphic for *Lkb1* are less severely compromised  
281 than that of mice following *AMPK $\alpha1+\alpha2$*  deletion, these outcomes suggest that the  
282 PO<sub>2</sub>-dependence for depression of breathing frequency is steeper than that for tidal volume in mice  
283 with deficiencies within the *Lkb1*-AMPK signalling pathway. AMPK may therefore contribute to  
284 each component of HVRs via divergent brainstem networks that lie downstream of carotid body  
285 afferent input responses, a point emphasised by the fact that *AMPK $\alpha1+\alpha2$*  deletion is without effect  
286 on carotid body afferent discharge during hypoxia. That this may be the case gains further support  
287 from the generally held view that increases in breathing frequency during moderate to severe  
288 hypoxia are primarily driven by carotid body afferent input responses (see for example [21]).

289 Consistent with the aforementioned proposals, homozygous *Lkb1* deletion led to marked reductions  
290 in breathing frequency (excluding apnoeas) that were coupled with erratic “augmentation” of tidal  
291 volume responses during severe hypoxia. An explanation for this apparent increase in tidal volume  
292 was provided by the fact that *Lkb1* knockouts exhibited pronounced Cheyne-Stokes-like breathing

293 (CSB) during hypoxia. That said, it is curious to note that CSB in *Lkb1* knockouts is accompanied  
294 by loss of carotid body afferent inputs given that hyperactivity of these peripheral chemoreceptors  
295 has been identified as the cause of CSB when associated with heart failure [25]. One possible  
296 explanation for this contrary outcome could be that *Lkb1* deletion alone attenuated basal afferent  
297 discharge from the carotid body and virtually abolished increases in chemoafferent discharge  
298 during hypoxia and hypercapnia, actions that could serve to attenuate any inhibitory interactions  
299 between peripheral chemoreceptors and brainstem respiratory networks [15, 24]. That this might  
300 be the case is indicated by the fact that the peak of the sustained phase of the hypercapnic  
301 ventilatory response of *Lkb1* knockouts remained unaltered despite the reduction of afferent input  
302 responses. In other words, increases in controller gain within the central respiratory network could  
303 trigger CSB by enhancing the sensitivity to, and thus the degree of activation of central CO<sub>2</sub>-  
304 sensing neurons during hypercapnia [15] consequent to hypoventilation during hypoxia, leading to  
305 periodic augmentation of tidal volume in *Lkb1* knockouts alone. Consistent with this view, others  
306 have proposed that CSB may be caused by enhanced hypercapnic ventilatory responses driven by  
307 instability within respiratory networks consequent to either augmented chemoreflex gain,  
308 prolonged feedback delay [26] and/or enhanced central controller gain [27]. In short, apnoeic  
309 intervals may well be countered earlier in *Lkb1* knockouts through augmented central hypercapnic  
310 ventilatory responses consequent to reductions in basal and evoked carotid body afferent discharge  
311 frequencies [15, 24], resulting in CSB during periods of hypoxia-evoked reductions in breathing  
312 frequency. The more extreme patterns of non-rhythmic (ataxic) ventilation observed for  
313 *AMPK $\alpha$ 1/ $\alpha$ 2* knockouts [3] may thus be avoided. While less likely it is also conceivable that  
314 retention by *Lkb1* knockouts of greater capacity for rhythmic ventilation during hypoxia could be  
315 conferred by residual allosteric AMPK activation by AMP, because this occurs independent of  
316 *Lkb1* [1] and any fall in cellular ATP supply during hypoxia would be associated with not only

317 ADP accumulation but consequent increases in the AMP:ATP ratio via the adenylate kinase  
318 reaction. This may in its own right be sufficient to maintain oscillating central respiratory drive in  
319 a manner periodically triggered once a given severity of central hypoxia is breached. That said, if  
320 sighs are triggered by hypoxia at a given threshold [22, 28], central hypoxia is likely no more severe  
321 for *Lkb1* when compared to *AMPK $\alpha$ 1+ $\alpha$ 2* knockouts because: (1) A similar frequency of sighs is  
322 observed during hypoxia for each of these genotypes; (2) Apnoeas are shorter and less frequent for  
323 *Lkb1* when compared to *AMPK $\alpha$ 1+ $\alpha$ 2* knockouts; (3) Only *Lkb1* knockouts exhibit CSB between  
324 apnoeas, which would periodically raise O<sub>2</sub> supply. Therefore, unless loss of carotid body afferent  
325 input responses in *Lkb1* knockouts alters functional hyperaemia at the level of the brainstem and  
326 via neuronal pathways independent of those mediating HVRs, it seems most likely that differences  
327 in outcome between genotypes arise from means other than variations in severity of brainstem  
328 hypoxia. However, for this question to be answered conclusively we would need to identify the  
329 precise hypoxia-responsive brainstem region(s) affected by our gene deletion strategies and obtain  
330 direct, region-specific measurements of local PO<sub>2</sub>.

331 While the aforementioned findings run counter to the view that increased afferent discharge from  
332 carotid body to brainstem alone determines the ventilatory response to a fall in arterial PO<sub>2</sub> they  
333 do provide substantial support for an alternative yet inclusive perspective, namely that HVRs are  
334 determined by the coordinated action of the carotid body and an hypoxia-responsive circuit within  
335 the brainstem [3, 5, 16, 17]. To date little emphasis has been placed on the role of hypoxia-sensing  
336 downstream, at the level of the brainstem perhaps because HVRs are so effectively abolished by  
337 resection of the carotid sinus nerve in humans [29]. And yet brainstem hypoxia induces an HVR  
338 when in receipt of normoxic carotid body afferent inputs [17], and directly activates subsets of  
339 catecholaminergic neurons within the brainstem nucleus of the solitary tract [30] and rostral  
340 ventrolateral medulla [5, 31, 32] in a manner that may be supported by direct activation by hypoxia

341 of ATP/lactate release from brainstem astrocytes [33, 34]. Moreover and consistent with the fact  
342 that our gene deletion strategy targeted catecholaminergic neurons, ectopic expression aside,  
343 extensive investigations have demonstrated that following carotid body resection, hypoxia-  
344 responsive catecholaminergic neurons of the caudal brainstem may underpin partial recovery of  
345 the HVR in a variety of animal models [5]. Accordingly, dysfunction of these neurons has been  
346 shown to underpin hypoventilation and apnoea associated with Rett syndrome, which is  
347 exacerbated during hypoxia [35].

348 Insights into the mechanisms that determine afferent discharge from the carotid body may also be  
349 garnered from our observation that *Lkb1* but not *AMPK $\alpha$ 1+ $\alpha$ 2* deletion markedly attenuated basal  
350 afferent fibre discharge and blocked increases in afferent discharge during hypercapnia, given that  
351 increases in afferent discharge during hypercapnia are triggered by membrane depolarisation  
352 consequent to hypercapnic acidosis and in a manner not directly influenced by reductions in  
353 mitochondrial oxidative phosphorylation or deficits in ATP supply [36]. This suggests that while  
354 *Lkb1* contributes to the maintenance of carotid body afferent discharge, it does not necessarily  
355 support type I cell oxygen-sensing *per se*. We must, however, add a note of caution here, because  
356 this assay does not directly distinguish between actions on the type I cells and tyrosine hydroxylase  
357 expressing glossopharyngeal nerves. Nevertheless, we can conclude that *Lkb1* expression is  
358 somehow necessary for chemoafferent outflow from the carotid body. That said, the reduced  
359 hypercapnic chemoafferent responses could alternatively be due to the removal of CO<sub>2</sub>-O<sub>2</sub> stimulus  
360 interaction [37, 38]. Either way, our findings suggest that *Lkb1* determines, independent of AMPK,  
361 carotid body chemoafferent discharge [39]. *Lkb1* could conceivably contribute to developmental  
362 expansion of carotid body type I cells, or to the regulation of glucose homeostasis [40, 41] and  
363 mitochondrial function [42, 43], either directly or in a manner supported by constitutive  
364 phosphorylation of one or more of the 12 AMPK-related kinases [44]. In short, a role for *Lkb1* in

365 the carotid body that is independent of the modification in AMPK activity is intriguing, but further,  
366 extensive investigations will be required to determine the precise mechanism(s) involved.

367

#### 368 **4. CONCLUSION**

369 Lkb1 and AMPK provide hierarchical control of the chemo-sensory respiratory network. Firstly,  
370 Lkb1 appears to determine, independent of AMPK, a set-point about which carotid body afferent  
371 input responses are evoked during hypoxia and hypercapnia, rather than contributing to oxygen-  
372 sensing *per se*. Thereafter the Lkb1-AMPK signalling pathway likely governs, through the capacity  
373 for AMPK activation by increases in AM(D)P/ATP ratio and Lkb1-dependent phosphorylation,  
374 coincidence detection and thus signal integration within a hypoxia-responsive circuit downstream  
375 of the carotid body, that encompasses, at the very least, the nucleus of the solitary tract and  
376 ventrolateral medulla [3]. Afferent input responses and brainstem hypoxia could thereby determine,  
377 each in part, the set-point about which AMPK and thus the brainstem respiratory networks are  
378 activated during hypoxia. Subsequently, AMPK-dependent modulation of cellular metabolism[1],  
379 ion channels [23, 45] and thus neuronal activities [46, 47] may facilitate efferent output and  
380 increases in ventilatory drive during hypoxia. It is therefore conceivable that Lkb1 and/or AMPK  
381 deficiency may contribute to Cheyne-Stokes breathing [26] and/or sleep disordered breathing  
382 associated with, for example, heart failure [25], metabolic syndrome-related disorders[48] and  
383 ascent to altitude [49].

384

#### 385 **5. METHODS**

386 Experiments were carried out as described previously[3], were approved by local ethical review  
387 committees, the University Director of Veterinary Services and the Home Office (Science, UK),



388 and complied with the regulations of the United Kingdom Animals (Scientific Procedures) Act of  
389 1986.

### 390 **5.1 Breeding of mice, genotyping and single cell PCR**

391 Standard approaches were used. All mice studied were between 3-12 months of age. Both males  
392 and females were studied.

393 For *Lkb1* deletion we used mice with exons 5-7 of the *Lkb1* gene (STK11) replaced by a cDNA  
394 cassette encoding equivalent exon sequences, and exon 4 and the cDNA cassette flanked by loxP  
395 sequences (*Lkb1<sup>fl/fl</sup>*). These mice were crossed with transgenic mice expressing Cre-recombinase  
396 under the tyrosine hydroxylase promoter (Th-IRES-Cre; EM:00254)[12]. Wild type or floxed *Lkb1*  
397 alleles were detected using two primers, p200, 5'-CCAGCCTTCTGACTCTCAGG-3' and p201,  
398 5'-GTAGGTATTCCAGGCCGTCA-3'. For the detection of CRE recombinase we employed:  
399 TH3, 5'-CTTTCCTTCCTTTATTGAGAT-3', TH5, 5'-CACCCCTGACCCAAGCACT-3' and Cre-  
400 UD, 5'-GATACCTGGCCTGGTCTCG-3'. As *Lkb1<sup>fl/fl</sup>* mice are hypomorphic, exhibiting 5-10 fold  
401 lower LKB1 expression than *Lkb1<sup>+/+</sup>* littermates [9], we used as controls mice that express Cre via  
402 the tyrosine hydroxylase promoter (TH-Cre).

403 For deletion of the gene that encodes CaMKK2 (*CaMKK2*) wild type alleles were detected using  
404 two primers, KKBeta1, 5'CAGCACTCAGCTCCAATCAA3', and KKBeta2,  
405 5'GCCACCTATTGCC TTGTTTG3'. The PCR protocol used for all genotype primers was: 92°C  
406 for 5min, 92°C for 45s, 56°C for 45s, 72°C for 60s, and 72°C for 7min for 35 cycles and then 4°C  
407 as the holding temperature. 15 µl samples were run on 2% agarose gels with 10 µl SYBR®Safe  
408 DNA Gel Stain (Invitrogen) in TBE buffer against a 100 bp DNA ladder (GeneRuler™, Fermentas)  
409 using a Model 200/2.0 Power Supply (Bio-Rad). Gels were imaged using a Genius Bio Imaging  
410 System and GeneSnap software (Syngene).

411 We also used conditional deletion of the genes for the *AMPK $\alpha$ 1* and  *$\alpha$ 2* subunits, utilising mice in  
412 which the sequence encoding the catalytic site of both of the  $\alpha$  subunits was flanked by loxP  
413 sequences ( *$\alpha$ 1<sup>lox</sup>* and  *$\alpha$ 2<sup>lox</sup>* [10]). We used two primers for each AMPK catalytic subunit:  $\alpha$ 1-  
414 forward: 5' TATTGCTGCCATTAGGCTAC 3',  $\alpha$ 1-reverse: 5'  
415 GACCTGACAGAATAGGATATGCCCAACCTC 3';  $\alpha$ 2-forward 5'  
416 GCTTAGCACGTTACCCTGGATGG 3',  $\alpha$ 2-reverse: 5' GTTATCAGCCCAACTAATTACAC  
417 3'. To direct *AMPK* deletion to identified oxygen-sensing cells of the carotid body and brainstem,  
418 these were crossed with TH-Cre mice as above. We detected the presence of wild-type or floxed  
419 *AMPK* alleles and Cre-recombinase by PCR. 15  $\mu$ l samples were run on 2% agarose gels and  
420 imaged as described above.

## 421 **5.2 Single-cell end-point PCR**

422 Carotid bodies were incubated at 37°C for 25-30 min in isolation medium consisting of:  
423 0.125mg/ml Trypsin (Sigma), 2.5mg/ml collagenase Type 1 (Worthington) made up in low  
424 Ca<sup>2+</sup>/low Mg<sup>2+</sup> HBSS. During this incubation the carotid bodies were separated from the associated  
425 patch of artery. The carotid bodies were then transferred to low Ca<sup>2+</sup>/low Mg<sup>2+</sup> HBSS containing  
426 trypsin inhibitor (0.5mg/ml) for 5min at room temperature, and then to 2ml of pre-equilibrated  
427 (95% air, 5% CO<sub>2</sub>, 37°C) growth medium (F-12 Ham nutrient mix, 10% fetal bovine serum, 1%  
428 penicillin/streptomycin). The medium containing the carotid bodies was centrifuged and the pellet  
429 re-suspended in 100 $\mu$ l of growth medium. Carotid bodies were then disrupted by triturating using  
430 fire polished Pasteur pipettes.

431 RNA was extracted using the High Pure RNA Tissue Kit (Roche) following the manufacturer's  
432 guidelines and the concentration determined using the Nanodrop 1000 spectrophotometer  
433 (ThermoScientific). cDNA synthesis was carried out using the Transcriptor High Fidelity cDNA  
434 synthesis Kit (Roche) following the manufacturers' instructions. Amplification of cDNA isolated

435 from different individual cells was run in parallel with negative and positive controls using an  
436 initial denaturing step at 94°C for 5min and then denaturing at 94°C for 30s, annealing at 60°C for  
437 45s, and extension for 60s at 72°C with a final 7min extension at 72°C. Initially 15 cycles were  
438 performed, followed by reaction and dilution for a further 38 cycles. To detect tyrosine  
439 hydroxylase, primers obtained from Qiagen (Quantitect Primer Assay, QT00101962) were used  
440 with an expected band length of 96bp. For the detection of Lkb1 two primers were used, *forward*  
441 and *reverse*, to generate an expected band length of 92bp.

442 Negative controls included control cell aspirants, lacking reverse transcriptase, aspiration of  
443 extracellular medium and PCR controls; these produced no detectable amplicons, ruling out  
444 genomic or other contamination. 15µl samples and a 100bp DNA ladder (GeneRuler™, Fermentas)  
445 were run on 2% agarose gels with SYBR®Safe DNA Gel Stain (Invitrogen). Gels were imaged  
446 using a Genius Bio Imaging System and GeneSnap software (Syngene). Positive controls were  
447 from samples rich in adrenomedullary chromaffin cells, dissected from adrenal glands of C57/Bl6  
448 mice. RNA was extracted using the High Pure RNA Tissue Kit (Roche) following the  
449 manufacturer's guidelines and the concentration determined using the Nanodrop 1000  
450 spectrophotometer (ThermoScientific). cDNA synthesis was carried out using the Transcriptor  
451 High Fidelity cDNA kit (Roche) following manufacturers instructions.

### 452 **5.3 Quantitative RT-PCR**

453 RNA from adrenal glands was extracted, quantified and reverse transcribed as described above.  
454 For qPCR analysis, 2.5 µl of cDNA in RNase free water was made up to 25 µl with FastStart  
455 Universal SYBR Green Master (ROX, 12.5 µl, Roche), Ultra Pure Water (8 µl, SIGMA) and  
456 forward and reverse primers for Lkb1. The sample was then centrifuged and 25 µl added to a  
457 MicroAmp™ Fast Optical 96-Well Reaction Plate (Greiner bio-one), the reaction plate sealed with

458 an optical adhesive cover (Applied Biosystems) and the plate centrifuged. The reaction was then  
459 run on a sequence detection system (Applied Biosystems) using AmpliTaq Fast DNA Polymerase,  
460 with a 2min initial step at 50°C, followed by a 10min step at 95°C, then a 15s step at 95°C which  
461 was repeated 40 times. Then a dissociation stage with a 15s step at 95°C followed by a 20s at 60°C  
462 and a 15s step at 95°C. Negative controls included control cell aspirants for which no reverse  
463 transcriptase was added, and aspiration of extracellular medium and PCR controls. None of the  
464 controls produced any detectable amplicon, ruling out genomic or other contamination.

#### 465 **5.4 Plethysmography**

466 We used unrestrained whole-body plethysmography, incorporating a Halcyon™ low noise  
467 pneumatochograph coupled to FinePointe acquisition and analysis software with a sampling  
468 frequency of 1kHz (Buxco Research Systems, UK). All quoted values for HVR were derived from  
469 apnoea-free periods of ventilation. Any unreliable and erratic respiratory waveforms recorded  
470 during gross un-ventilatory related body movements, i.e. sniffing and grooming, were avoided for  
471 measurements. Additionally, a rejection algorithm that was built into the plethysmography system  
472 (Buxco Electronics Inc.) identified periods of motion-induced-artefacts for omission. The patented  
473 Halycon™ low noise pneumotachograph (Buxco Electronics Inc.) reduces disturbances caused by  
474 air currents from outside the chambers (i.e. fans, closing doors, air conditioners, etc.), which can  
475 disrupt or overwhelm the ventilatory airflows within the chamber.

476 Mice were placed in the plethysmography chamber for a 10-20 min acclimation period under  
477 normoxia (room air) to establish a period of quiet and reliable breathing for baseline-ventilation  
478 levels (this is also indicated by a measured rejection index of 0 by the FinePointe Acquisition and  
479 Analysis Software). Mice were then exposed to hypoxia (12% or 8% O<sub>2</sub>, with 0.05% CO<sub>2</sub>, balanced  
480 with N<sub>2</sub>), hypoxia+hypercapnia (8% O<sub>2</sub>, 5% CO<sub>2</sub>, balanced with N<sub>2</sub>) or hypercapnia (21% O<sub>2</sub>, 5%  
481 CO<sub>2</sub>, balanced with N<sub>2</sub>) for 5min. Medical grade gas mixtures were chosen by switching a gas tap.

482 The time for evacuation of the dead space and complete exchange of gas within the  
483 plethysmography chamber was 30s. The duration of exposure to hypoxia quoted was the actual  
484 duration of hypoxia. Apnoea was defined as cessations of breathing greater than the average  
485 duration, including interval, of 2 successive breaths (600ms) during normoxia, with a detection  
486 threshold of 0.25 mmHg (SD of noise). Breathing variability was assessed by Poincaré plots and  
487 by calculating the SD of inter-breath (BB) intervals. The breathing frequency, tidal volume, and  
488 minute ventilation as derived by the FinePointe Software were also analysed for control and  
489 knockout mice. These parameters were measured as mean values taken over a 2s breathing period  
490 and not on a breath-to-breath basis. The changes in breathing frequency, tidal volume, and minute  
491 ventilation during hypoxia and/or hypercapnia were analysed as the percentage change from  
492 normoxia respective to each individual mouse. The peak of the augmenting phase (A) was  
493 calculated from the peak value between 20-40s of the hypoxic and/or hypercapnic exposure that  
494 coincides with the peak of the rising phase. The roll off period was calculated as the lowest value  
495 between 60-140s of exposure and the sustained phase was calculated from the last 20s in the  
496 plateaued phase. A large time range was required for selection of these points as experiments were  
497 performed on unrestrained and awake animals and periods of no movement, sniffing, or grooming,  
498 were only considered.

499 Apnoeas were excluded from all stated measures (mean±SEM) of breathing frequency, tidal  
500 volume and minute ventilation, i.e., all quoted values were derived from apnoea-free periods of  
501 ventilation.

502

### 503 **5.5 Isolated carotid body**

504 Methods for single fibre chemoafferent activity were adapted from those described previously[14,  
505 50]. Plots of firing frequency versus superfusate  $pO_2$  were fitted by non-linear regression

506 (GraphPad Prism 6).

507 Single fibre chemoafferent activity was amplified and filtered and recorded using a 1401 interface  
508 running Spike 2 software (Cambridge Electronic Design). Single- or few-fibre chemoafferent  
509 recordings were made from carotid bifurcations held in a small volume tissue bath, and superfused  
510 (36-37°C) with gassed (95% O<sub>2</sub> and 5% CO<sub>2</sub>), bicarbonate-buffered saline solution (composition  
511 (mM): 125 NaCl, 3 KCl, 1.25 NaH<sub>2</sub>PO<sub>4</sub>, 5 Na<sub>2</sub>SO<sub>4</sub>, 1.3 MgSO<sub>4</sub>, 24 NaHCO<sub>3</sub>, 2.4 CaCl<sub>2</sub>). A  
512 standard O<sub>2</sub> electrode (ISO2; World Precision Instruments) was placed in the superfusate system  
513 at the point of entry to the recording chamber in order to continuously record the superfusate  
514 PO<sub>2</sub>. Flow meters with high precision valves (Cole Palmer Instruments) were used to equilibrate  
515 the superfusate with a desired gas mixture. Basal single fibre activity was monitored at a  
516 superfusate PO<sub>2</sub> of 200mmHg and a PCO<sub>2</sub> of 40mmHg. This PO<sub>2</sub> is slightly lower than that  
517 previously used for the rat carotid body[51] to take in account the smaller size of this organ in the  
518 mouse (and thus a smaller diffusion distance). At this superfusate PO<sub>2</sub>, the basal frequency in TH-  
519 Cre single fibres (Figure 1) was consistent with that reported *in vivo* in other rodents[52] and so  
520 we interpret this PO<sub>2</sub> to have not been excessively hyperoxic.

521 To induce responses to hypoxia, the superfusate PO<sub>2</sub> was slowly reduced to a minimum of 40  
522 mmHg or was reversed prior to this when the chemoafferent response had stabilised or had begun  
523 to diminish. The single fibre chemoafferent discharge frequency was plotted against the  
524 superfusate PO<sub>2</sub> over a desired range of superfusate PO<sub>2</sub> values. To produce the hypoxic response  
525 curves, the data points were fitted to an exponential decay curve with offset, as shown below:

$$526 \quad y = a + be^{-cx}$$

527 For the above equation, y is the single fibre discharge frequency in Hz, x is the superfusate PO<sub>2</sub> in  
528 mmHg, a is the discharge frequency as the PO<sub>2</sub> tends to infinity (offset), b is the discharge  
529 frequency when the PO<sub>2</sub> is 0 mmHg (minus the offset) and c is the exponential rate constant.

530 **5.6 Statistical analysis**

531 Statistical comparison was completed using GraphPad Prism 6 for the following: *Afferent*  
532 *discharge*, single or 2 factor ANOVA with Bonferroni Dunn post hoc analysis; *Plethysmography*,  
533 one-way ANOVA with Bonferroni multiple comparison's test;  $P < 0.05$  was considered significant.

534  
535 **COMPETING INTERESTS:** The authors declare no competing financial interests nor any  
536 competing non-financial interests.

537  
538 **ACKNOWLEDGEMENTS**

539 This work was primarily funded by the Wellcome Trust (WT081195MA). A.M.E. thanks Professor  
540 D. Grahame Hardie for his continued guidance, support and for providing the Lkb1 floxed mice.  
541 We would also like to thank Professor Michael J. Shipston and Helene Widmer for their kind help  
542 and assistance with the single cell PCR shown in the supplementary information.

543  
544 **REFERENCES**

- 545 1. Ross F.A., MacKintosh C. & Hardie D.G. AMP-activated protein kinase: a cellular energy  
546 sensor that comes in 12 flavours. *FEBS J.* **83**, 2987-3001 (2016).
- 547 2. Gowans G.J., Hawley S.A., Ross F.A. & Hardie D.G. AMP is a true physiological regulator  
548 of AMP-activated protein kinase by both allosteric activation and enhancing net phosphorylation.  
549 *Cell Metab.* **18**, 556-566 (2013).
- 550 3. Mahmoud A.D., Lewis S., Juricic L., Udoh U.A., Hartmann S., Jansen M.A., Ogunbayo  
551 O.A., Puggioni P., Holmes A.P., Kumar P., Navarro-Dorado J., Foretz M., Viollet B., Dutia M.B.,  
552 Marshall I. & Evans A.M. AMPK Deficiency Blocks the Hypoxic Ventilatory Response and Thus  
553 Precipitates Hypoventilation and Apnea. *Am. J. Respir. Crit. Care Med.* **193**, 1032-1043 (2016).
- 554 4. Wilson R.J. & Teppema L.J. Integration of Central and Peripheral Respiratory  
555 Chemoreflexes. *Compr. Physiol.* **6**, 1005-1041 (2016).
- 556 5. Teppema L.J. & Dahan A. The ventilatory response to hypoxia in mammals: mechanisms,  
557 measurement, and analysis. *Physiol. Rev.* **90**, 675-754 (2010).
- 558 6. Guyenet P.G. Neural structures that mediate sympathoexcitation during hypoxia. *Resp.*  
559 *Physiol.* **121**, 147-162 (2000).
- 560 7. Smith J.C., Abdala A.P., Borgmann A., Rybak I.A. & Paton J.F. Brainstem respiratory  
561 networks: building blocks and microcircuits. *Trends. Neurosci.* **36**, 152-162 (2013).
- 562 8. Nurse C.A. Synaptic and paracrine mechanisms at carotid body arterial chemoreceptors. *J.*  
563 *Physiol.* **592**, 3419-3426 (2014).
- 564 9. Sakamoto K., McCarthy A., Smith D., Green K.A., Hardie D.G., Ashworth A. & Alessi  
565 D.R. Deficiency of LKB1 in skeletal muscle prevents AMPK activation and glucose uptake during  
566 contraction. *EMBO J.* **24**, 1810-1820 (2005).
- 567 10. Lantier L., Fentz J., Mounier R., Leclerc J., Treebak J.T., Pehmoller C., Sanz N., Sakakibara  
568 I., Saint-Amand E., Rimbaud S., Maire P., Marette A., Ventura-Clapier R., Ferry A., Wojtaszewski

- 569 J.F., Foretz M. & Viollet B. AMPK controls exercise endurance, mitochondrial oxidative capacity,  
570 and skeletal muscle integrity. *FASEB J*, **28**, 3211-3224 (2014).
- 571 11. Hirooka Y., Polson J.W., Potts P.D. & Dampney R.A. Hypoxia-induced Fos expression in  
572 neurons projecting to the pressor region in the rostral ventrolateral medulla. *Neuroscience* **80**,  
573 1209-1224 (1997).
- 574 12. Lindeberg J., Usoskin D., Bengtsson H., Gustafsson A., Kylberg A., Soderstrom S. &  
575 Ebendal T. Transgenic expression of Cre recombinase from the tyrosine hydroxylase locus.  
576 *Genesis* **40**, 67-73 (2004).
- 577 13. Anderson K.A., Ribar T.J., Lin F., Noeldner P.K., Green M.F., Muehlbauer M.J., Witters  
578 L.A., Kemp B.E. & Means A.R. Hypothalamic CaMKK2 contributes to the regulation of energy  
579 balance. *Cell Metab.* **7**, 377-388 (2008).
- 580 14. Mahmoud A.D., Lewis S., Juricic L., Udoh U.A., Hartmann S., Jansen M.A., Ogunbayo  
581 O.A., Puggioni P., Holmes A.P., Kumar P., Navarro-Dorado J., Foretz M., Viollet B., Dutia M.B.,  
582 Marshall I. & Evans A.M. AMP-activated Protein Kinase Deficiency Blocks the Hypoxic  
583 Ventilatory Response and Thus Precipitates Hypoventilation and Apnea. *Am. J. Respir. Crit. Care*  
584 *Med.* **193**, 1032-1043 (2016).
- 585 15. Day T.A. & Wilson R.J. Brainstem PCO<sub>2</sub> modulates phrenic responses to specific carotid  
586 body hypoxia in an in situ dual perfused rat preparation. *J. Physiol.* **578**, 843-857 (2007).
- 587 16. Smith C.A., Engwall M.J., Dempsey J.A. & Bisgard G.E. Effects of specific carotid body  
588 and brain hypoxia on respiratory muscle control in the awake goat. *J. Physiol.* **460**, 623-640 (1993).
- 589 17. Curran A.K., Rodman J.R., Eastwood P.R., Henderson K.S., Dempsey J.A. & Smith C.A.  
590 Ventilatory responses to specific CNS hypoxia in sleeping dogs. *J. Appl. Physiol.* **88**, 1840-1852  
591 (2000).
- 592 18. Chapman R.W., Santiago T.V. & Edelman N.H. Effects of graded reduction of brain blood  
593 flow on ventilation in unanesthetized goats. *J. Appl. Physiol. Respir. Environ. Exerc. Physiol.* **47**,  
594 104-111 (1979:).
- 595 19. Martin-Body R.L., Robson G.J. & Sinclair J.D. Restoration of hypoxic respiratory  
596 responses in the awake rat after carotid body denervation by sinus nerve section. *J. Physiol.* **380**,  
597 61-73 (1986).
- 598 20. Hodson E.J., Nicholls L.G., Turner P.J., Llyr R., Fielding J.W., Douglas G., Ratnayaka I.,  
599 Robbins P.A., Pugh C.W., Buckler K.J., Ratcliffe P.J. & Bishop T. Regulation of ventilatory  
600 sensitivity and carotid body proliferation in hypoxia by the PHD2/HIF-2 pathway. *J. Physiol.* **594**,  
601 1179-1195 (2016).
- 602 21. Martin-Body R.L., Robson G.J. & Sinclair J.D. Respiratory effects of sectioning the carotid  
603 sinus glossopharyngeal and abdominal vagal nerves in the awake rat. *J Physiol* **1361**, 35-45 (1985).
- 604 22. Li P., Janczewski W.A., Yackle K., Kam K., Pagliardini S., Krasnow M.A. & Feldman J.L.  
605 The peptidergic control circuit for sighing. *Nature* **530**, 293-297 (2016).
- 606 23. Ross F.A., Rafferty J.N., Dallas M.L., Ogunbayo O., Ikematsu N., McClafferty H., Tian L.,  
607 Widmer H., Rowe I.C., Wyatt C.N., Shipston M.J., Peers C., Hardie D.G. & Evans A.M. Selective  
608 Expression in Carotid Body Type I Cells of a Single Splice Variant of the Large Conductance  
609 Calcium- and Voltage-activated Potassium Channel Confers Regulation by AMP-activated Protein  
610 Kinase. *J. Biol. Chem.* **286**, 11929-11936 (2011).
- 611 24. Blain G.M., Smith C.A., Henderson K.S. & Dempsey J.A. Peripheral chemoreceptors  
612 determine the respiratory sensitivity of central chemoreceptors to CO<sub>2</sub>. *J Physiol* **588**, 2455-2471  
613 (2010).



- 614 25. Ponikowski P., Chua T.P., Anker S.D., Francis D.P., Doehner W., Banasiak W., Poole-  
615 Wilson P.A., Piepoli M.F. & Coats A.J. Peripheral chemoreceptor hypersensitivity: an ominous  
616 sign in patients with chronic heart failure. *Circulation* **104**, 544-549 (2001).
- 617 26. Hall M.J., Xie A., Rutherford R., Ando S., Floras J.S. & Bradley T.D. Cycle length of  
618 periodic breathing in patients with and without heart failure. *Am. J. Respir. Crit. Care Med.* **154**,  
619 376-381 (1996).
- 620 27. Topor Z.L., Vasilakos K., Younes M. & Remmers J.E. Model based analysis of sleep  
621 disordered breathing in congestive heart failure. *Resp. Physiol. Neurobiol.* **155**, 82-92 (2007).
- 622 28. Bell H.J. & Azubike E, Haouzi P. The "other" respiratory effect of opioids: suppression of  
623 spontaneous augmented ("sigh") breaths. *J. Appl. Physiol.* **111**, 1296-1303 (2011).
- 624 29. Wade J.G., Larson C.P. Jr., Hickey R.F., Ehrenfeld W.K. & Severinghaus J.W. Effect of  
625 carotid endarterectomy on carotid chemoreceptor and baroreceptor function in man. *New England*  
626 *J. Med.* **282**, 823-829 (1970).
- 627 30. Pascual O., Morin-Surun M.P., Barna B., Denavit-Saubie M., Pequignot J.M. &  
628 Champagnat J. Progesterone reverses the neuronal responses to hypoxia in rat nucleus tractus  
629 solitarius in vitro. *J. Physiol.* **544**, 511-520 (2002).
- 630 31. Nolan P.C. & Waldrop T.G. In vivo and in vitro responses of neurons in the ventrolateral  
631 medulla to hypoxia. *Brain Res.* **630**, 101-114 (1993).
- 632 32. Sun M.K. & Reis D.J. Differential responses of barosensitive neurons of rostral  
633 ventrolateral medulla to hypoxia in rats. *Brain Res.* **609**, 333-337 (1993).
- 634 33. Angelova P.R., Kasymov V., Christie I., Sheikhabahaei S., Turovsky E., Marina N., Korsak  
635 A., Zwicker J., Teschemacher A.G., Ackland G.L., Funk G.D., Kasparov S., Abramov A.Y. &  
636 Gourine A.V. Functional Oxygen Sensitivity of Astrocytes. *J. Neurosci.* **35**, 10460-10473 (2015).
- 637 34. Magistretti P.J. & Allaman I. Lactate in the brain: from metabolic end-product to signalling  
638 molecule. *Nat. Rev. Neurosci.* **19**, 235-249 (2018).
- 639 35. Roux J.C. & Villard L. Biogenic amines in Rett syndrome: the usual suspects. *Behavior*  
640 *Genetics* **40**, 59-75 (2010).
- 641 36. Mulligan E. & Lahiri S. Separation of carotid body chemoreceptor responses to O<sub>2</sub> and  
642 CO<sub>2</sub> by oligomycin and by antimycin A. *Am. J. Physiol.* **242**, C200-206 (1982).
- 643 37. Dasso L.L., Buckler K.J., Vaughan-Jones R.D. Interactions between hypoxia and  
644 hypercapnic acidosis on calcium signaling in carotid body type I cells. *Am. J. Physiol.* **279**, L36-  
645 42 (2000).
- 646 38. Pepper D.R., Landauer R.C. & Kumar P. Postnatal development of CO<sub>2</sub>-O<sub>2</sub> interaction in  
647 the rat carotid body in vitro. *J. Physiol.* **485**, 531-541 (1995).
- 648 39. Murali S. & Nurse C.A. Purinergic signalling mediates bidirectional crosstalk between  
649 chemoreceptor type I and glial-like type II cells of the rat carotid body. *J. Physiol.* **594**, 391-406  
650 (2016).
- 651 40. Shaw R.J., Lamia K.A., Vasquez D., Koo S.H., Bardeesy N., Depinho R.A., Montminy M.  
652 & Cantley L.C. The kinase LKB1 mediates glucose homeostasis in liver and therapeutic effects of  
653 metformin. *Science* **310**, 1642-1646 (2005).
- 654 41. Patel K., Foretz M., Marion A., Campbell D.G., Gurlay R., Boudaba N., Tournier E.,  
655 Titchenell P., Pegg M., Deak M., Wan M., Kaestner K.H., Goransson O., Viollet B., Gray N.S.,  
656 Birnbaum M.J., Sutherland C. & Sakamoto K. The LKB1-salt-inducible kinase pathway functions  
657 as a key gluconeogenic suppressor in the liver. *Nature Comm.* **5**, 4535 (2014).
- 658 42. Gan B., Hu J., Jiang S., Liu Y., Sahin E., Zhuang L., Fletcher-Sananikone E., Colla S.,  
659 Wang Y.A., Chin L., Depinho R.A. Lkb1 regulates quiescence and metabolic homeostasis of  
660 haematopoietic stem cells. *Nature* **468**, 701-704 (2010).

- 661 43. Swisa A., Granot Z., Tamarina N., Sayers S., Bardeesy N., Philipson L., Hodson D.J.,  
662 Wikstrom J.D., Rutter G.A., Leibowitz G., Glaser B. & Dor Y. Loss of Liver Kinase B1 (LKB1)  
663 in Beta Cells Enhances Glucose-stimulated Insulin Secretion Despite Profound Mitochondrial  
664 Defects. *J. Biol. Chem.* **290**, 20934-20946 (2015).
- 665 44. Lizcano J.M., Goransson O., Toth R., Deak M., Morrice N.A., Boudeau J., Hawley S.A.,  
666 Udd L., Makela T.P., Hardie D.G., Alessi D.R. LKB1 is a master kinase that activates 13 kinases  
667 of the AMPK subfamily, including MARK/PAR-1. *EMBO J.* **23**, 833-843 (2004).
- 668 45. Ikematsu N., Dallas M.L., Ross F.A., Lewis R.W., Rafferty J.N., David J.A., Suman R.,  
669 Peers C., Hardie D.G. & Evans A.M. Phosphorylation of the voltage-gated potassium channel  
670 Kv2.1 by AMP-activated protein kinase regulates membrane excitability. *PNAS* **108**, 18132-18137  
671 (2011).
- 672 46. Lipton A.J., Johnson M.A., Macdonald T., Lieberman M.W., Gozal D. & Gaston B. S-  
673 nitrosothiols signal the ventilatory response to hypoxia. *Nature* **413**, 171-174 (2001).
- 674 47. Murphy B.A., Fakira K.A., Song Z., Beuve A., Routh V.H. AMP-activated protein kinase  
675 and nitric oxide regulate the glucose sensitivity of ventromedial hypothalamic glucose-inhibited  
676 neurons. *Am. J. Physiol.* **297**, C750-758 (2009).
- 677 48. Chau E.H., Lam D., Wong J., Mokhlesi B. & Chung F. Obesity hypoventilation syndrome:  
678 a review of epidemiology, pathophysiology, and perioperative considerations. *Anesthesiology* **117**,  
679 188-205 (2012).
- 680 49. Ainslie P.N., Lucas S.J. & Burgess K.R. Breathing and sleep at high altitude. *Respir.*  
681 *Physiol. Neurobiol.* **188**, 233-256 (2013).
- 682 50. Wyatt C.N., Mustard K.J., Pearson S.A., Dallas M.L., Atkinson L., Kumar P., Peers C.,  
683 Hardie D.G. & Evans A.M. AMP-activated protein kinase mediates carotid body excitation by  
684 hypoxia. *J. Biol. Chem.* **282**, 8092-8098 (2007).
- 685 51. Holmes A.P., Turner P.J., Buckler K.J. & Kumar P. Moderate inhibition of mitochondrial  
686 function augments carotid body hypoxic sensitivity. *Pflugers Arch.* **468**, 143-155 (2016).
- 687 52. Vidruk E.H., Olson E.B. Jr., Ling L. & Mitchell G.S. Responses of single-unit carotid body  
688 chemoreceptors in adult rats. *J. Physiol.* **531**, 165-170 (2001).
- 689
- 690

691 **FIGURES AND LEGENDS**

692  
693

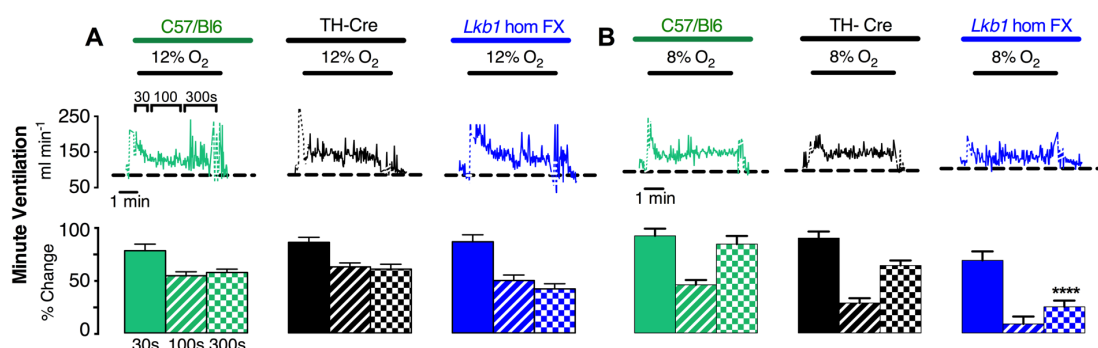

694  
695  
696  
697  
698  
699  
700  
701  
702  
703  
704  
705

**Figure 1 - Mice hypomorphic for Lkb1 exhibit an attenuated hypoxic ventilatory response measured by unrestrained plethysmography.**

*Upper panels* show example records and *lower panels* bar charts of mean±SEM for increases in minute ventilation at the peak of the Augmenting Phase (A, ~30s), after Roll Off (RO, ~100s) and during the plateau of the Sustained Phase (SP, ~300s) of the ventilatory response to (A) 12% and (B) 8% O<sub>2</sub> for C57Bl6 (green, n = 6), TH-Cre (black, n = 31) and *Lkb1* homozygous floxed mice (*Lkb1* hom FX, blue, n = 14) which are globally hypomorphic (~90% loss of Lkb1). \*\*\*\*=p<0.0001 relative to TH-Cre and C57/Bl6.

706

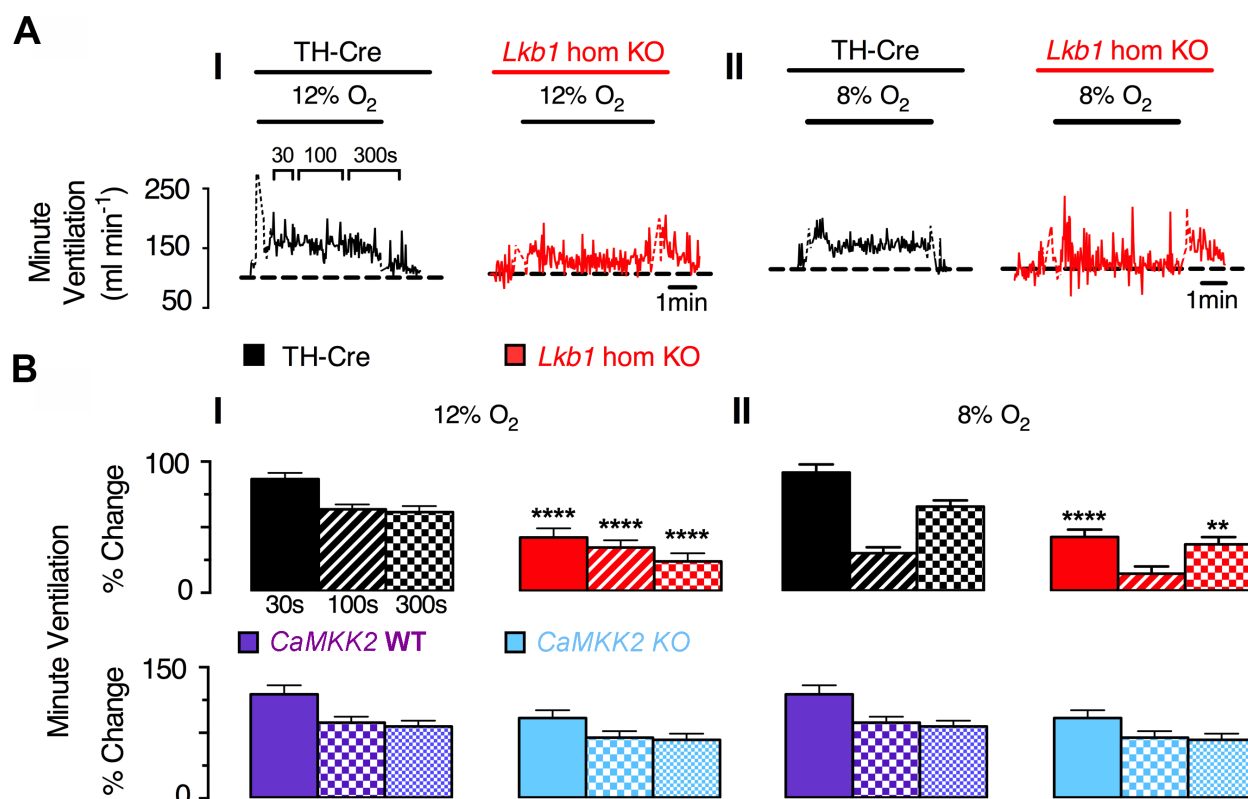

707

708

709

710

711

712

713

714

715

716

717

718

719

720

**Figure 2 - Conditional deletion of *Lkb1* in tyrosine hydroxylase expressing cells markedly attenuates the hypoxic ventilatory response measured by unrestrained plethysmography, but global *CaMKK2* knockout does not.**

A, Example records of minute ventilation (ml min<sup>-1</sup> g<sup>-1</sup>) versus time during (I) 12% O<sub>2</sub> and (II) 8% O<sub>2</sub> for TH-Cre (black, n = 31) and conditional *Lkb1* knockout mice (*Lkb1* hom KO, red, n = 22). B, Bar charts show mean ± SEM for changes in minute ventilation at the peak of the Augmenting Phase (A, ~30s), at 100s following Roll Off (RO, ~100s) and the plateau of the Sustained Phase (SP, 300s) of the response to hypoxia of (Upper Panels) TH-Cre (black, n = 31) conditional *Lkb1* hom KO (red, n = 22) and (Lower Panels) *CaMKK2* WT (purple, n = 7) and global *CaMKK2* KO (blue, n = 7). \* = p < 0.05, \*\*\*\* = p < 0.00001.

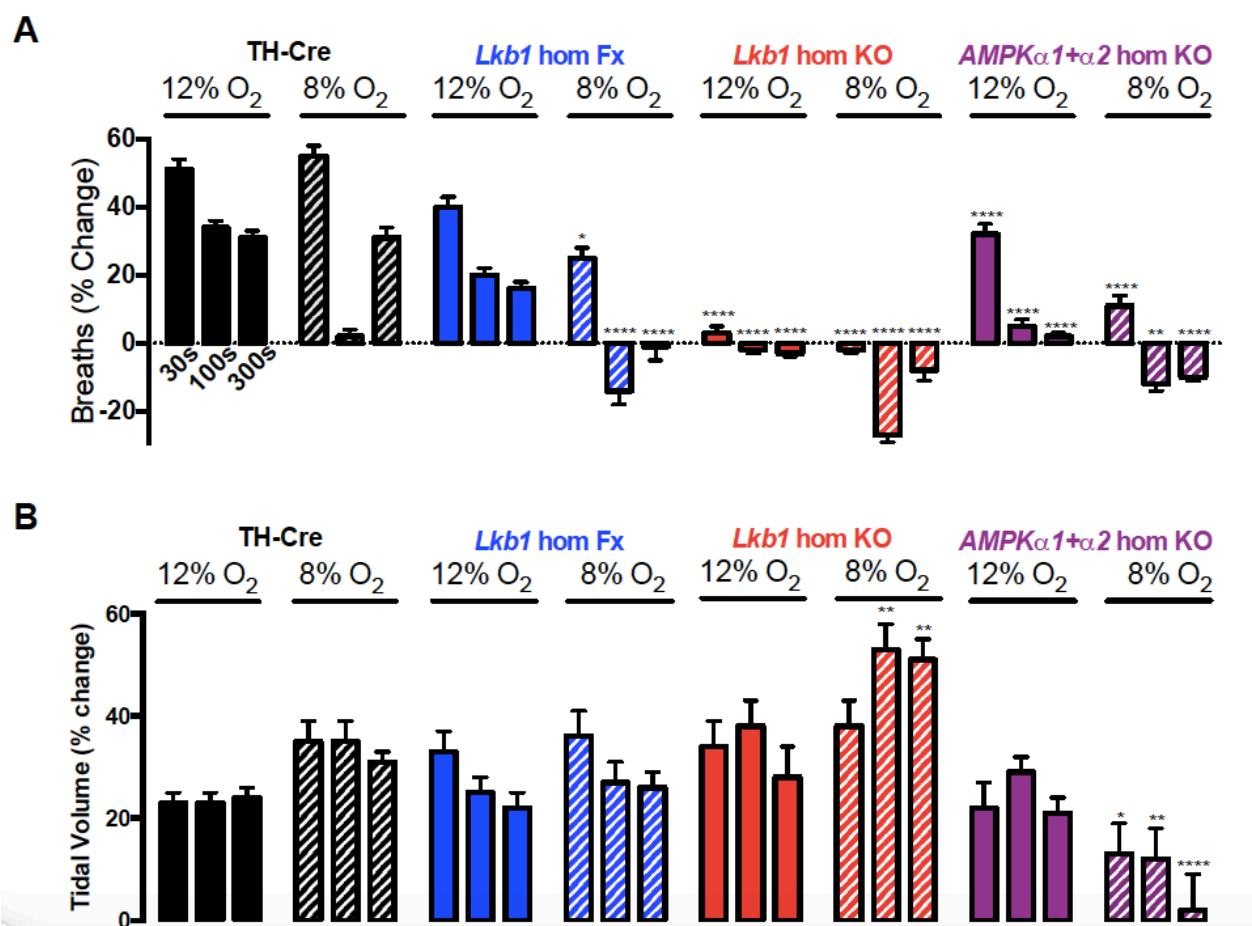

721  
 722 **Figure 3 - Conditional deletion of *Lkb1* in tyrosine hydroxylase expressing cells blocks**  
 723 **increases in breathing frequency but augments increases in tidal volume during severe**  
 724 **hypoxia measured by unrestrained plethysmography.**  
 725 Bar charts of mean±SEM for increases in (A) Breathing frequency and (B) Tidal volume At the  
 726 peak of the Augmenting Phase (~30s), at ~100s following Roll Off and during the plateau of the  
 727 Sustained Phase (~300s) of the ventilatory response to hypoxia for TH-Cre (black, n = 31), *Lkb1*  
 728 homozygous floxed mice (*Lkb1* hom Fx, blue, n = 22) that are ~90% hypomorphic for *Lkb1* and  
 729 conditional *Lkb1* homozygous knockout mice (*Lkb1* hom KO, red, n = 22). These data are also  
 730 compared with outcomes for conditional *AMPK $\alpha$ 1+ $\alpha$ 2* homozygous knockout mice (*AMPK $\alpha$ 1+ $\alpha$ 2*  
 731 hom KO, mauve, n = 26-30). \*= $p$ <0.05, \*\*= $p$ <0.01, \*\*\*\*= $p$ < 0.0001 compared to  
 732 TH-Cre.  
 733

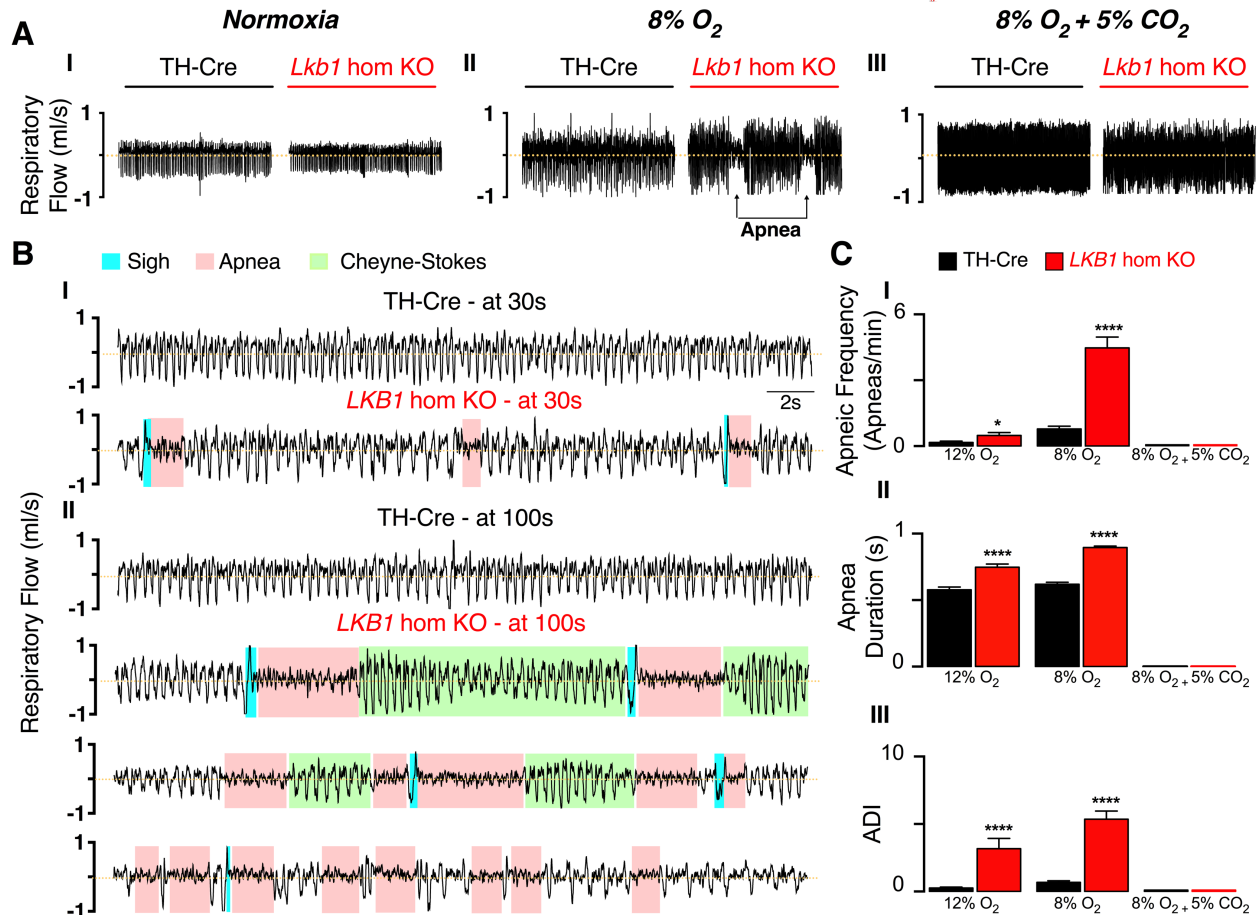

734  
735  
736  
737  
738  
739  
740  
741  
742  
743  
744  
745  
746  
747  
748  
749

**Figure 4 - Unrestrained plethysmography shows that conditional deletion of *Lkb1* in tyrosine hydroxylase expressing cells precipitates hypoventilation, apnoea and Cheyne-Stokes-like breathing during severe hypoxia.**

A, Example records of ventilatory activity from TH-Cre and conditional *Lkb1* homozygous knockout mice (*Lkb1* hom KO) during (I) normoxia (21% O<sub>2</sub>), (II) hypoxia (8% O<sub>2</sub>) and (III) hypoxia with hypercapnia (8% O<sub>2</sub> + 5% CO<sub>2</sub>), that were obtained using whole body plethysmography. B(I-II), Typical ventilatory records for TH-Cre and conditional *Lkb1* hom KO mice on an expanded time scale at the indicated time points during exposures to severe hypoxia (8% O<sub>2</sub>). C, mean±SEM for (I) apnoeic index (per minute), (II) apnoea duration (s) and (III) apnoea-duration index (frequency x duration) for TH-Cre (black, n = 31) and conditional *Lkb1* hom KO (red, n = 22) mice during exposures to 12% O<sub>2</sub>, 8% O<sub>2</sub> and 8% O<sub>2</sub> + 5% CO<sub>2</sub>. \*=*p*<0.05, \*\*\*\*=*p*< 0.0001.

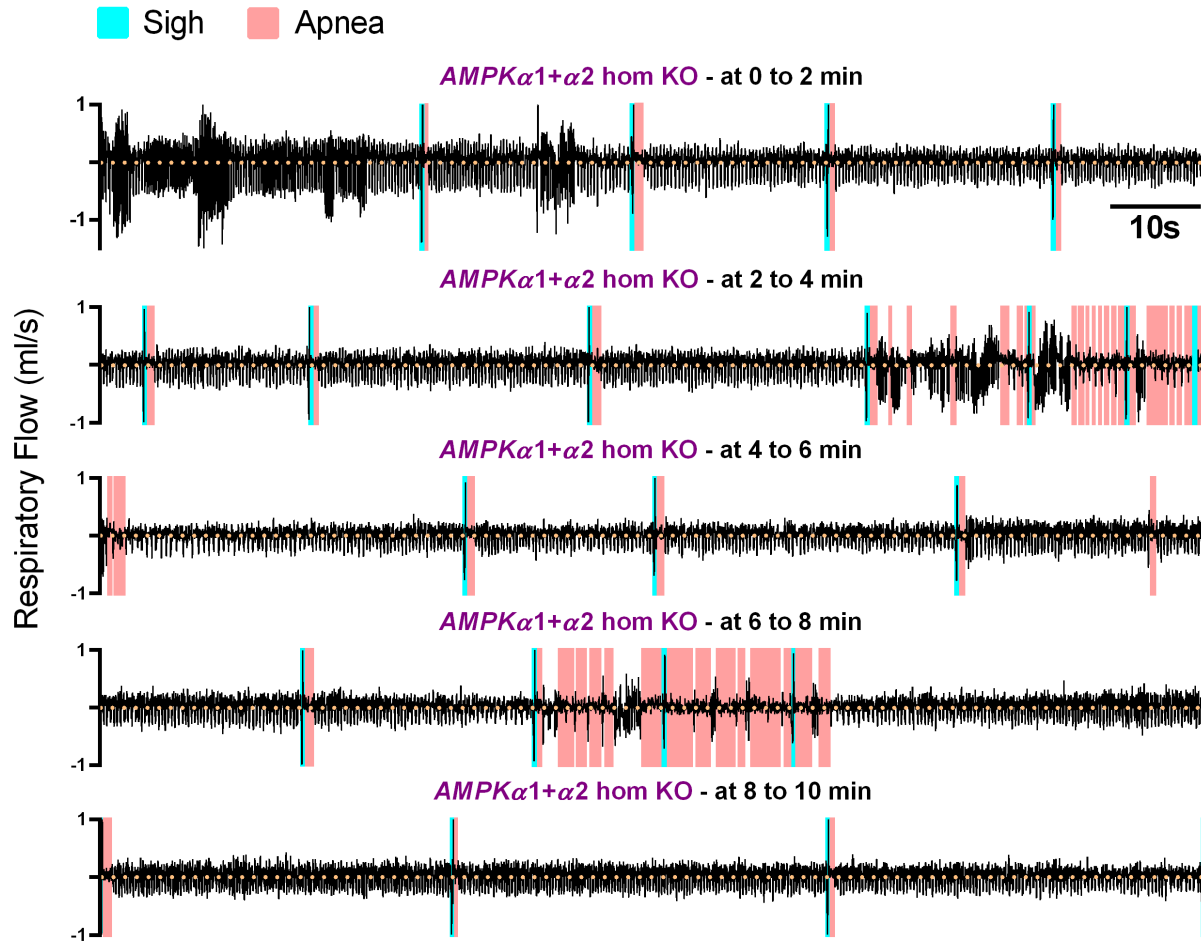

750  
751  
752  
753  
754  
755  
756  
757  
758  
759

**Figure 5 - Conditional deletion of *AMPK- $\alpha$ 1+ $\alpha$ 2* in tyrosine hydroxylase expressing cells does not precipitate Cheyne-Stokes-like ventilation even during prolonged 10 minute exposures to severe hypoxia during unrestrained plethysmography.**

Typical ventilatory record for conditional *AMPK- $\alpha$ 1+ $\alpha$ 2* double knockout mice (*AMPK $\alpha$ 1+ $\alpha$ 2* hom KO) during a 10 minute exposure to severe hypoxia (8% O<sub>2</sub>).

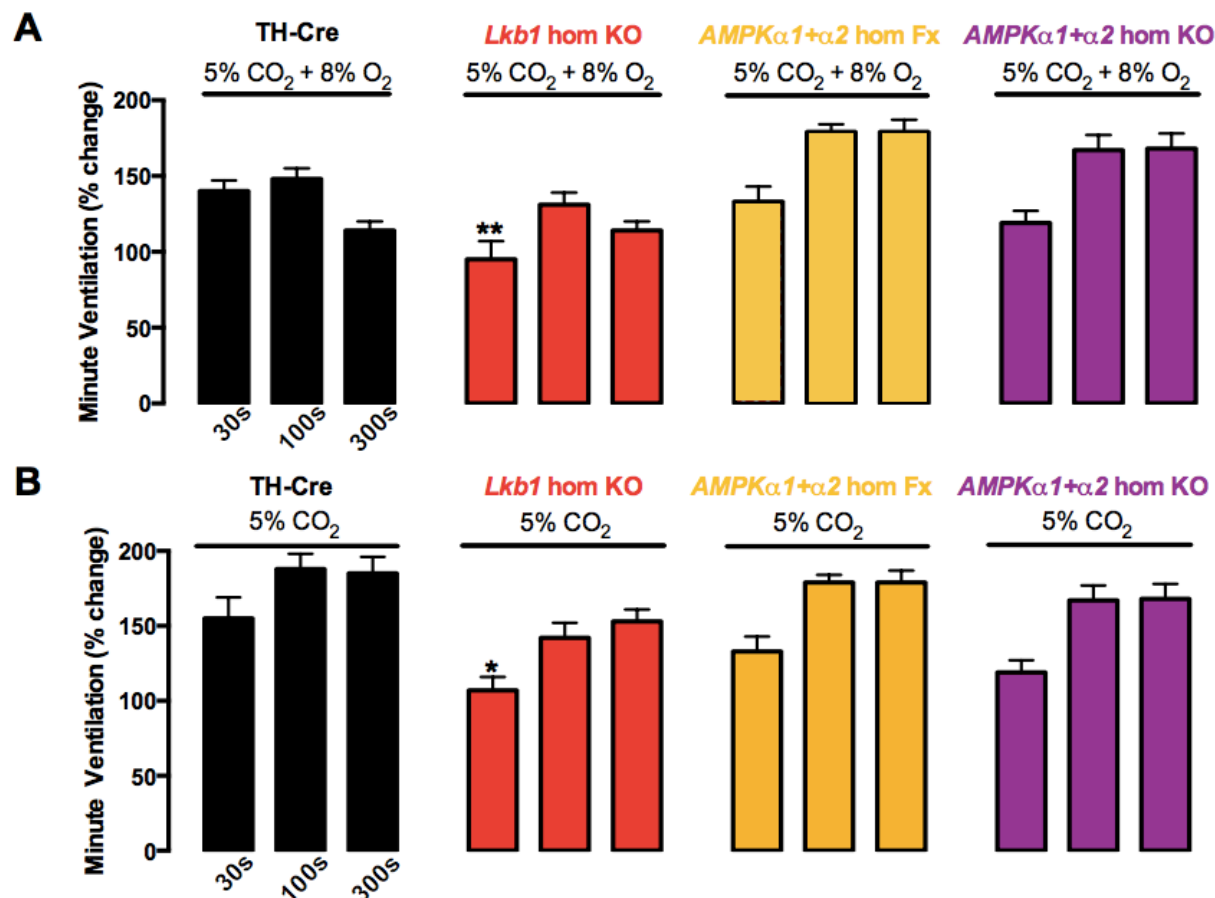

760  
761  
762  
763  
764  
765  
766  
767  
768  
769  
770

**Figure 6 - Conditional deletion of *Lkb1* in tyrosine hydroxylase expressing cells markedly slows the hypercapnic ventilatory response measured by unrestrained plethysmography.**

Bar charts of mean±SEM for increases in minute ventilation at ~30s, 100s and 300s during exposures to (A) Hypercapnic hypoxia (5% CO<sub>2</sub>+8%O<sub>2</sub>) and (B) Hypercapnia (5% CO<sub>2</sub>) for TH-Cre (black, n = 31), conditional *Lkb1* homozygous knockout mice (*Lkb1* hom KO, red, n = 22), *AMPKα1+α2* homozygous floxed mice (*AMPKα1+α2* hom Fx, beige, n = 26) and *AMPKα1+α2* homozygous knockout mice (*AMPKα1+α2* hom KO, mauve, n = 30). \*=*p*<0.05, \*\*=*p*< 0.0001.



771

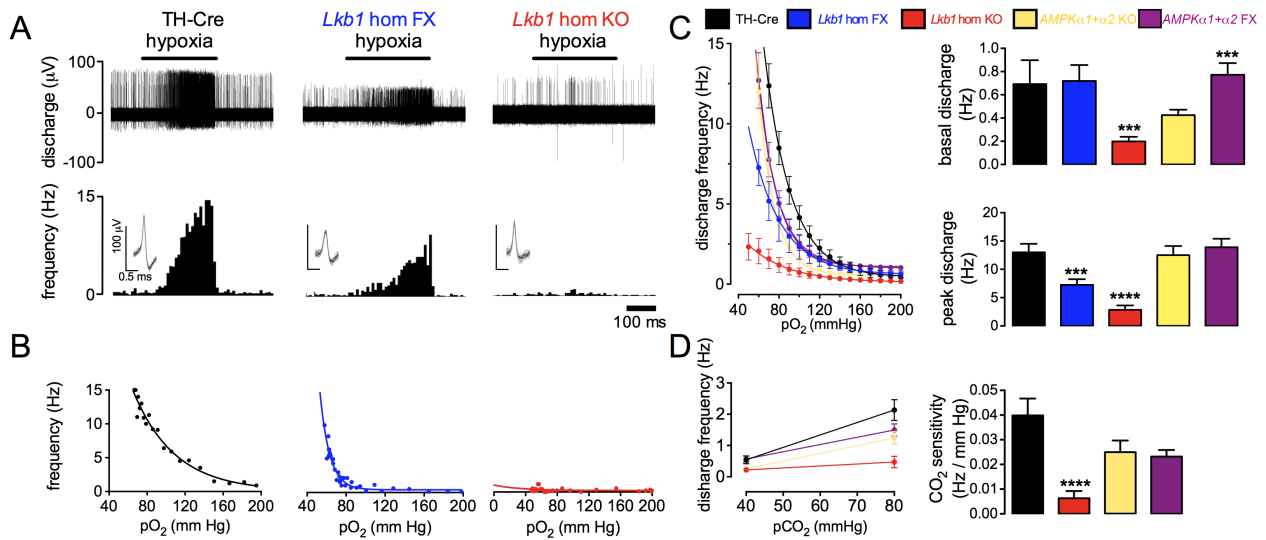

772

773 **Figure 7 – Conditional deletion of *Lkb1* but not *AMPK- $\alpha$ 1+ $\alpha$ 2* in tyrosine hydroxylase**  
 774 **positive cells attenuates afferent discharge from the carotid body in-vitro during normoxia,**  
 775 **hypoxia and hypercapnia**

776 A, *Upper panels* show extracellular recordings of chemoafferent discharge versus time for carotid  
 777 bodies from control (TH-Cre, black), *Lkb1* homozygous floxed (*Lkb1* hom FX, blue) and  
 778 conditional *Lkb1* homozygous knockout (*Lkb1* hom KO, red) mice, *Lower panels* show frequency-  
 779 time histograms (*inset*: single fibre discriminations). B, Frequency-*pO*<sub>2</sub> response curves  
 780 corresponding to records in (A). C, *Left hand panel* compares mean±SEM for frequency-*pO*<sub>2</sub>  
 781 response curves for TH-Cre (black, n = 8), *Lkb1* hom FX (blue, n = 7), conditional *Lkb1* hom KO  
 782 (red, n = 7), *AMPK- $\alpha$ 1* and - $\alpha$ 2 double floxed (*AMPK* hom FX, beige, n=5) and conditional *AMPK- $\alpha$ 1+ $\alpha$ 2*  
 783 double knockouts (*AMPK* hom DKO, mauve, n=5). Bar charts in *right hand panels* show  
 784 mean±SEM for (*upper*) basal single fibre discharge frequency and (*lower*) peak single fibre  
 785 discharge frequency during hypoxia. D, Mean±SEM for chemoafferent discharge versus *pCO*<sub>2</sub> (*left*  
 786 *hand panel*) and CO<sub>2</sub> sensitivity (*right hand panel*) for TH-Cre, *Lkb1* hom KO, *AMPK* hom FX  
 787 and *AMPK* hom DKO. \*\*\* = *p*<0.001, \*\*\*\*=*p*< 0.0001.

788

789

790

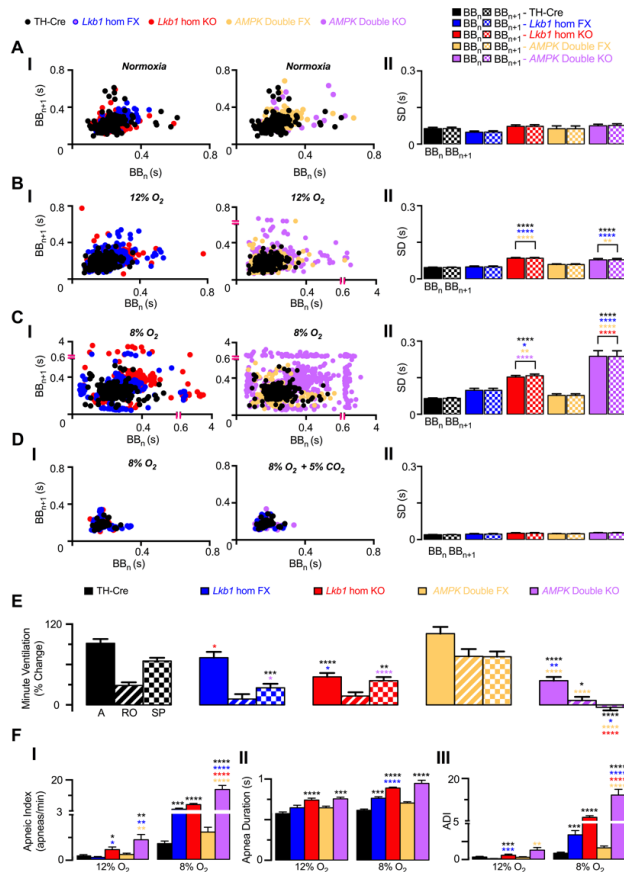

791

792

793

794

795

796

797

798

799

800

801

802

803

804

805

806

807

808

809

810

811

812

813

**Figure 8 – Unrestrained plethysmography reveals that respiratory dysfunction during hypoxia is less severe for conditional *Lkb1* deletion than for conditional *AMPK-α1+α2* deletion in catecholaminergic cells.**

AI, *Lefthand panel* shows exemplar Poincaré plots of the inter-breath interval ( $BB_n$ ) versus subsequent interval ( $BB_{n+1}$ ) during normoxia for controls (TH-Cre, black,  $n=31$ ), *Lkb1* homozygous floxed (*Lkb1* hom FX, blue,  $n=14$ ) and conditional *Lkb1* homozygous knockouts (*Lkb1* hom KO, red,  $n=22$ ). *Right hand panel* shows comparable data for *AMPK-α1+α2* double floxed mice (*AMPK* hom FX,  $n=31$ ) and conditional *AMPK-α1+α2* double knockouts (*AMPK* hom DKO,  $n=22$ ). AII, Corresponding mean±SEM for the standard deviation (SD) of  $BB_n$  and  $BB_{n+1}$  for each genotype are shown for normoxia. BI, Poincaré plots of  $BB_n$  versus  $BB_{n+1}$  for mild hypoxia (12%  $O_2$ ). BII, Corresponding mean±SEM for the standard deviation (SD) of  $BB_n$  and  $BB_{n+1}$  for each genotype are shown for mild hypoxia (12%  $O_2$ ). CI, Poincaré plots of  $BB_n$  versus  $BB_{n+1}$  for severe hypoxia (8%  $O_2$ ). CII, Corresponding mean±SEM for the standard deviation (SD) of  $BB_n$  and  $BB_{n+1}$  for each genotype are shown for severe hypoxia (8%  $O_2$ ). DI, Poincaré plots of  $BB_n$  versus  $BB_{n+1}$  for hypercapnic hypoxia (8%  $O_2$  + 5%  $CO_2$ ). Corresponding mean±SEM for the standard deviation (SD) of  $BB_n$  and  $BB_{n+1}$  for each genotype are shown for hypercapnic hypoxia (8%  $O_2$  + 5%  $CO_2$ ). E, Comparison for all genotypes tested of mean±SEM for the % change of minute ventilation at the peak of the Augmenting Phase (~30s), at ~100s following Roll Off and during the plateau of the Sustained Phase (~300s) during exposures to 8%  $O_2$ . F, Comparison for all genotypes tested of the mean±SEM for (I) apnoeic index (per minute), (II) apnoea duration (s) and (III) apnoea-duration index (frequency x duration).

\*= $p<0.05$ , \*\*= $p<0.01$ , \*\*\*= $p<0.001$ , \*\*\*\*= $p<0.0001$ .
